# Supplementary material
Source: PubMed Central journal article supplement (PMC17290)
Supplement: pnas_97_22_12038__2.pdf [file pnas_97_22_12038__2.pdf]

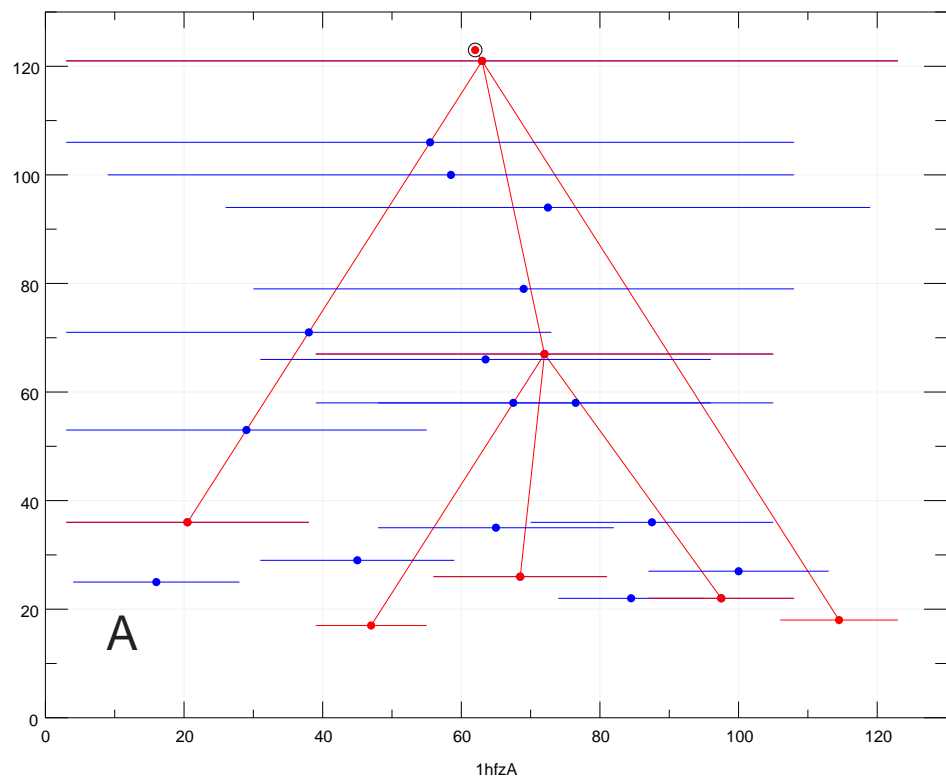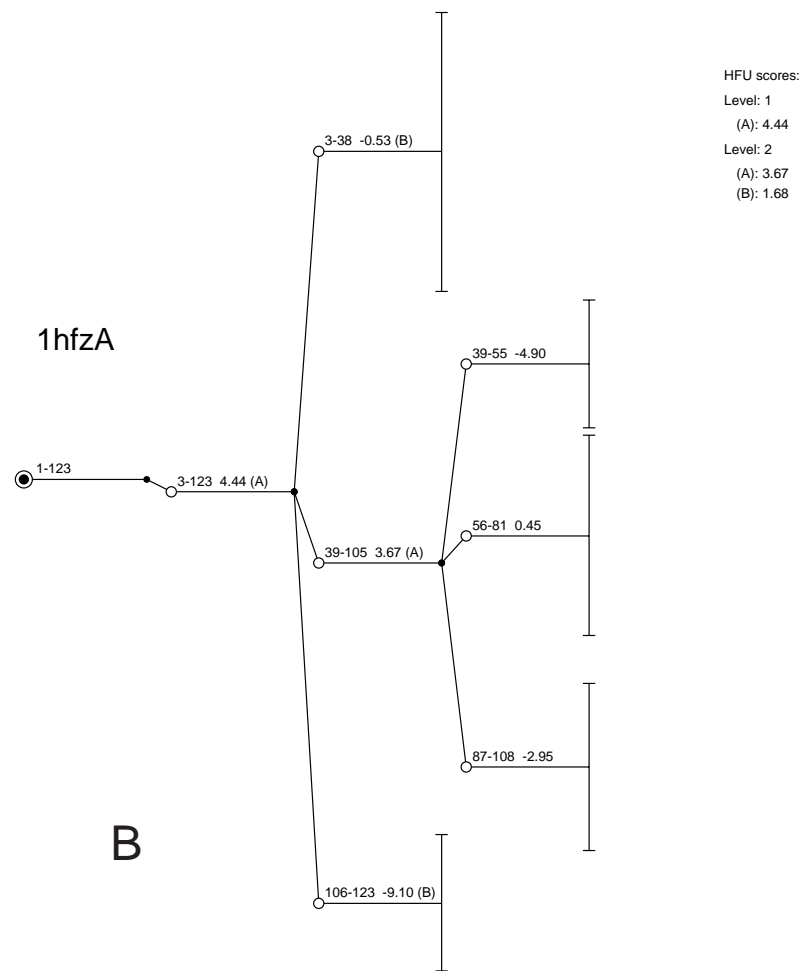

HFU scores:  
 Level: 1  
 (A): 4.44  
 Level: 2  
 (A): 3.67  
 (B): 1.68

**Fig. 5.** The 2-D fragment map (A) and detailed anatomy tree (B) for a-lactalbumin (PDB code: 1hfzA)
