# Supplementary material
Source: PubMed Central journal article supplement (PMC17290)
Supplement: pnas_97_22_12038__4.pdf [file pnas_97_22_12038__4.pdf]

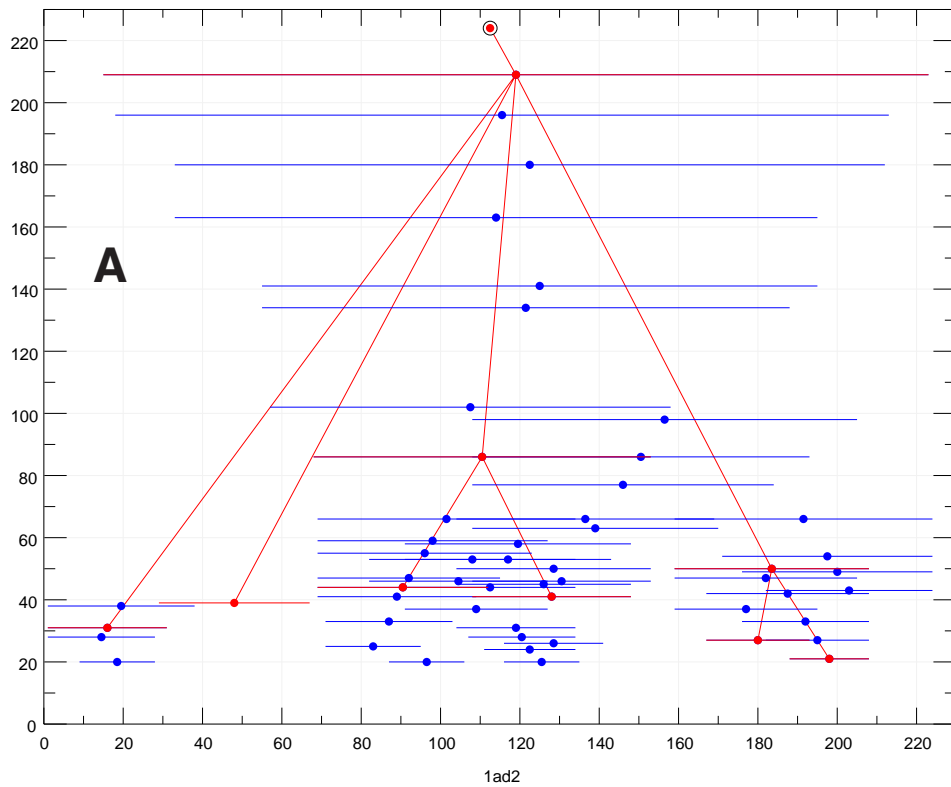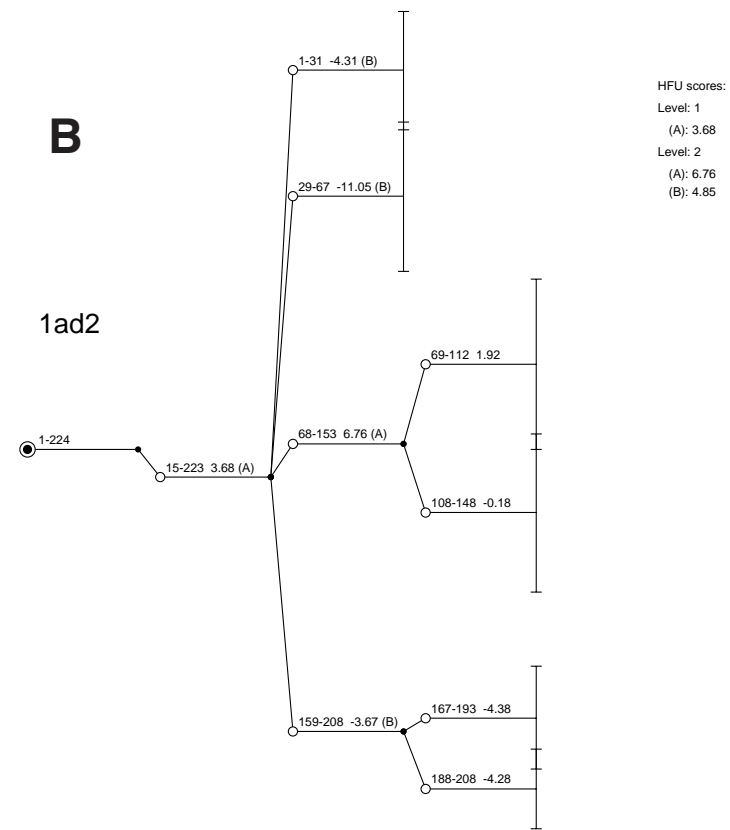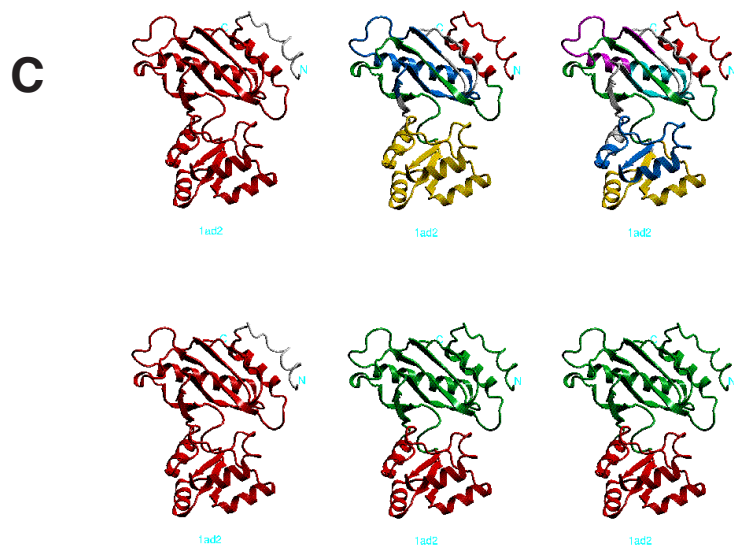

**Fig. 8.** The 2-D fragment map (A), detailed anatomy tree (B), and its graphical representation (C) for the ribosomal protein L1 (1ad2). See Fig. 3 A-C for the corresponding description.
