# Supplementary material
Source: PubMed Central journal article supplement (PMC17290)
Supplement: pnas_97_22_12038__5.pdf [file pnas_97_22_12038__5.pdf]

Table 1. A list of local minima found in the fragment map of Actin, 1atnA

| No. | Range   | Size | Z     | I     | H     | Score  |
|-----|---------|------|-------|-------|-------|--------|
| 1   | 146 337 | 192  | 1.652 | 0.052 | 0.809 | 6.677  |
| 2   | 187 260 | 74   | 1.455 | 0.097 | 0.761 | 5.786  |
| 3   | 181 272 | 92   | 1.500 | 0.108 | 0.766 | 5.450  |
| 4   | 185 268 | 84   | 1.475 | 0.122 | 0.767 | 5.443  |
| 5   | 7 373   | 367  | 1.849 | 0.005 | 0.829 | 4.993  |
| 6   | 179 337 | 159  | 1.710 | 0.091 | 0.785 | 4.901  |
| 7   | 8 348   | 341  | 1.816 | 0.039 | 0.824 | 4.727  |
| 8   | 104 373 | 270  | 1.817 | 0.078 | 0.808 | 4.541  |
| 9   | 71 373  | 303  | 1.860 | 0.074 | 0.815 | 4.123  |
| 10  | 150 295 | 146  | 1.661 | 0.142 | 0.774 | 4.098  |
| 11  | 104 340 | 237  | 1.768 | 0.120 | 0.800 | 3.959  |
| 12  | 7 138   | 132  | 1.605 | 0.175 | 0.768 | 3.808  |
| 13  | 71 340  | 270  | 1.818 | 0.114 | 0.807 | 3.675  |
| 14  | 154 278 | 125  | 1.657 | 0.159 | 0.757 | 3.382  |
| 15  | 7 178   | 172  | 1.715 | 0.179 | 0.775 | 2.970  |
| 16  | 7 104   | 98   | 1.627 | 0.177 | 0.734 | 2.736  |
| 17  | 1 104   | 104  | 1.660 | 0.159 | 0.731 | 2.665  |
| 18  | 187 215 | 29   | 1.428 | 0.219 | 0.673 | 2.265  |
| 19  | 33 68   | 36   | 1.466 | 0.110 | 0.642 | 2.258  |
| 20  | 212 337 | 126  | 1.755 | 0.168 | 0.742 | 2.202  |
| 21  | 32 138  | 107  | 1.657 | 0.213 | 0.732 | 1.912  |
| 22  | 259 337 | 79   | 1.579 | 0.231 | 0.718 | 1.902  |
| 23  | 7 295   | 289  | 1.928 | 0.119 | 0.792 | 1.877  |
| 24  | 33 86   | 54   | 1.501 | 0.173 | 0.664 | 1.798  |
| 25  | 276 337 | 62   | 1.568 | 0.226 | 0.706 | 1.790  |
| 26  | 7 279   | 273  | 1.913 | 0.135 | 0.787 | 1.684  |
| 27  | 71 138  | 68   | 1.478 | 0.339 | 0.724 | 1.366  |
| 28  | 32 178  | 147  | 1.778 | 0.213 | 0.746 | 1.316  |
| 29  | 32 99   | 68   | 1.604 | 0.205 | 0.685 | 1.205  |
| 30  | 71 279  | 209  | 1.865 | 0.199 | 0.771 | 1.172  |
| 31  | 71 178  | 108  | 1.626 | 0.302 | 0.744 | 1.161  |
| 32  | 7 215   | 209  | 1.854 | 0.199 | 0.763 | 0.901  |
| 33  | 32 279  | 248  | 1.952 | 0.156 | 0.770 | 0.866  |
| 34  | 53 138  | 86   | 1.648 | 0.294 | 0.719 | 0.585  |
| 35  | 53 178  | 126  | 1.764 | 0.274 | 0.739 | 0.413  |
| 36  | 71 149  | 79   | 1.581 | 0.343 | 0.711 | 0.165  |
| 37  | 87 138  | 52   | 1.479 | 0.376 | 0.692 | 0.147  |
| 38  | 13 72   | 60   | 1.626 | 0.207 | 0.650 | 0.074  |
| 39  | 136 176 | 41   | 1.419 | 0.370 | 0.661 | -0.014 |
| 40  | 87 178  | 92   | 1.652 | 0.329 | 0.719 | -0.029 |
| 41  | 295 339 | 45   | 1.545 | 0.288 | 0.659 | -0.058 |
| 42  | 226 257 | 32   | 1.504 | 0.227 | 0.619 | -0.125 |
| 43  | 32 215  | 184  | 1.906 | 0.226 | 0.738 | -0.390 |

|     |     |     |     |       |       |       |        |
|-----|-----|-----|-----|-------|-------|-------|--------|
| 44  | 53  | 149 | 97  | 1.736 | 0.303 | 0.709 | -0.469 |
| 45  | 100 | 178 | 79  | 1.612 | 0.353 | 0.698 | -0.553 |
| 46  | 1   | 72  | 72  | 1.701 | 0.222 | 0.650 | -0.694 |
| 47  | 71  | 215 | 145 | 1.817 | 0.294 | 0.732 | -0.702 |
| 48  | 136 | 185 | 50  | 1.448 | 0.385 | 0.655 | -0.731 |
| 49  | 71  | 201 | 131 | 1.757 | 0.331 | 0.725 | -0.946 |
| 50  | 53  | 214 | 162 | 1.895 | 0.275 | 0.733 | -1.015 |
| 51  | 136 | 215 | 80  | 1.667 | 0.320 | 0.675 | -1.119 |
| 52  | 279 | 298 | 20  | 1.450 | 0.321 | 0.599 | -1.259 |
| 53  | 156 | 215 | 60  | 1.639 | 0.303 | 0.651 | -1.268 |
| 54  | 150 | 178 | 29  | 1.429 | 0.394 | 0.622 | -1.320 |
| 55  | 150 | 215 | 66  | 1.623 | 0.330 | 0.660 | -1.321 |
| 56  | 100 | 138 | 39  | 1.462 | 0.428 | 0.643 | -1.530 |
| 57  | 87  | 214 | 128 | 1.858 | 0.313 | 0.711 | -1.653 |
| 58  | 51  | 89  | 39  | 1.633 | 0.292 | 0.628 | -1.660 |
| 59  | 150 | 186 | 37  | 1.407 | 0.430 | 0.623 | -1.684 |
| 60  | 53  | 102 | 50  | 1.689 | 0.303 | 0.643 | -1.805 |
| 61  | 104 | 215 | 112 | 1.792 | 0.336 | 0.694 | -1.949 |
| 62  | 87  | 201 | 115 | 1.797 | 0.352 | 0.701 | -2.069 |
| 63  | 259 | 370 | 112 | 1.902 | 0.268 | 0.678 | -2.089 |
| 64  | 136 | 201 | 66  | 1.600 | 0.385 | 0.650 | -2.195 |
| 65  | 276 | 370 | 95  | 1.900 | 0.269 | 0.662 | -2.364 |
| 66  | 100 | 149 | 50  | 1.557 | 0.414 | 0.638 | -2.383 |
| 67  | 71  | 102 | 32  | 1.558 | 0.377 | 0.615 | -2.461 |
| 68  | 260 | 295 | 36  | 1.529 | 0.367 | 0.597 | -2.667 |
| 69  | 49  | 68  | 20  | 1.616 | 0.213 | 0.563 | -2.681 |
| 70  | 347 | 371 | 25  | 1.610 | 0.262 | 0.570 | -2.903 |
| 71  | 1   | 34  | 34  | 1.535 | 0.380 | 0.590 | -3.052 |
| 72  | 10  | 34  | 25  | 1.467 | 0.438 | 0.584 | -3.237 |
| 73  | 311 | 330 | 20  | 1.594 | 0.301 | 0.561 | -3.498 |
| 74  | 295 | 370 | 76  | 1.890 | 0.306 | 0.625 | -3.760 |
| 75  | 260 | 279 | 20  | 1.466 | 0.417 | 0.556 | -3.779 |
| 76  | 112 | 135 | 24  | 1.522 | 0.441 | 0.581 | -3.806 |
| 77  | 252 | 277 | 26  | 1.538 | 0.435 | 0.577 | -4.044 |
| 78  | 311 | 339 | 29  | 1.674 | 0.302 | 0.561 | -4.144 |
| --- | --- | --- | --- | ----- | ----- | ----- | -----  |
