# Supplementary material
Source: PubMed Central journal article supplement (PMC17290)
Supplement: pnas_97_22_12038__6.pdf [file pnas_97_22_12038__6.pdf]

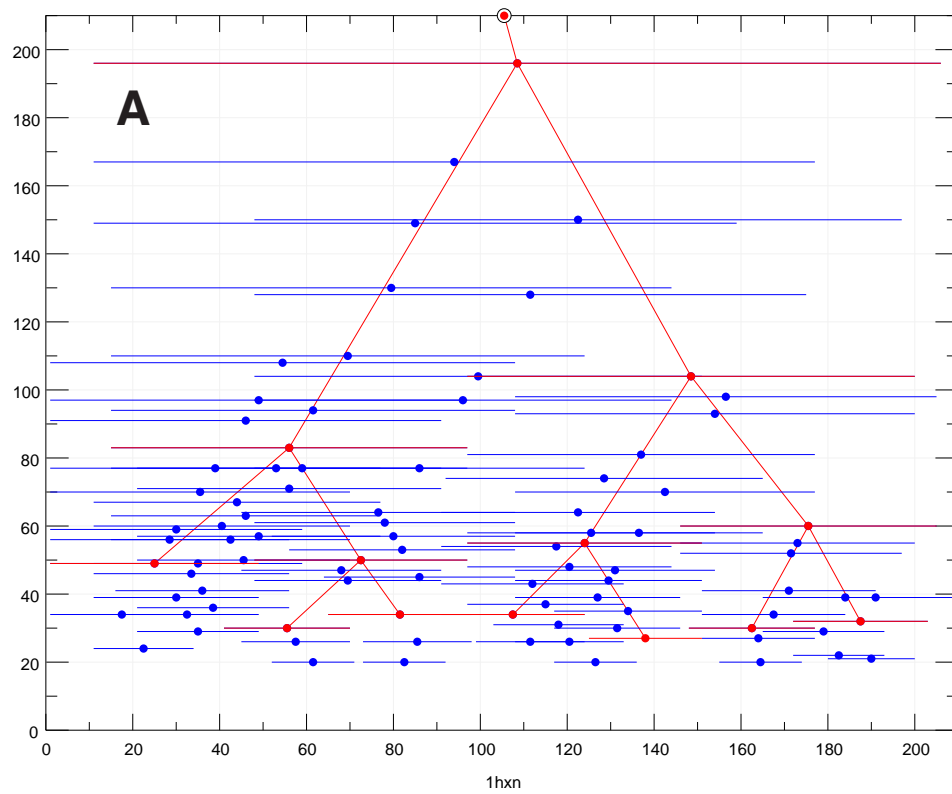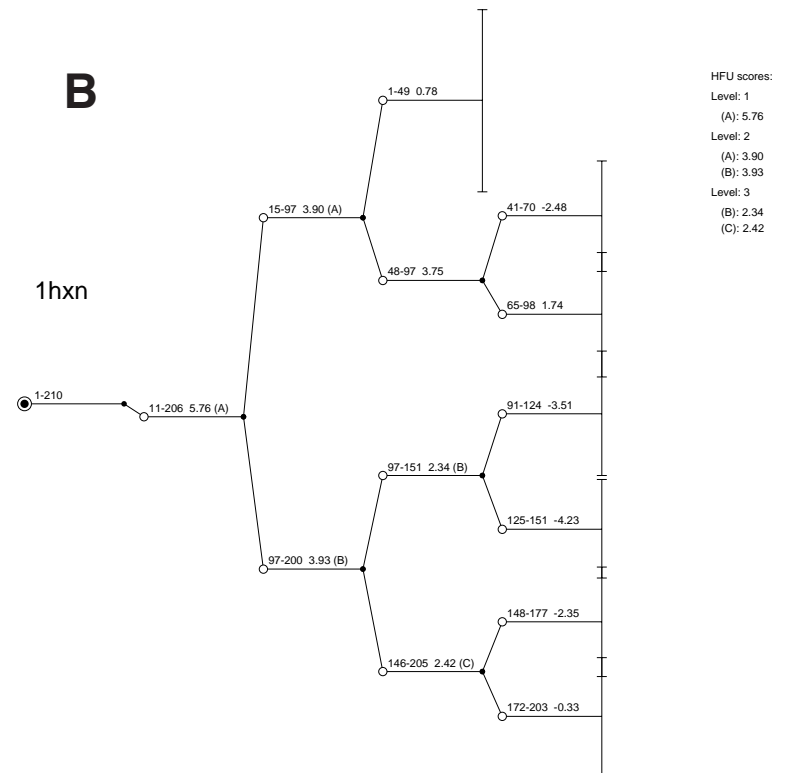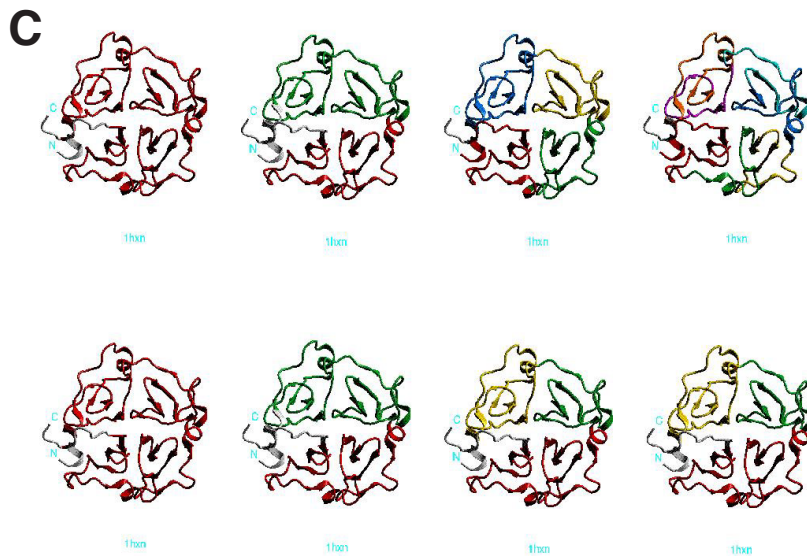

**Fig. 7.** The 2-D fragment map (A), detailed anatomy tree (B), and its graphical representation (C) for hemopexin (1hxn). See Fig. 3 A-C for the corresponding description.
